# Supplementary material
Source: PubMed Central journal article supplement (PMC9250904)
Supplement: mmc1.pdf [file mmc1.pdf]

1 **The impact of the COVID-19 pandemic on**  
2 **hepatitis B virus vaccination and transmission**  
3 **among men who have sex with men: a**  
4 **mathematical modelling study**

5  
6  
7  
8

**SUPPLEMENT**

9 We used a deterministic compartmental model that we have earlier developed to  
10 investigate the impact of hepatitis B virus (HBV) vaccination on HBV transmission among  
11 men who have sex with men (MSM). The model accounts for HBV vaccination via the  
12 National HBV Vaccination Programme for Risk Groups. MSM have been included in the  
13 programme since its start in 2002 [1, 2]. The model and data used for parameterisation  
14 have been described in detail in our earlier publication [3]. In this appendix, we repeated  
15 all relevant information from our earlier publication [3], as well as new data from 2020  
16 and 2021, as explained below.

17

18 **S1. Data sources**

19 Several model parameters were estimated using data from cohorts or studies among  
20 MSM in the Netherlands. The following data sources were used:

- 21 • Amsterdam Cohort Study (ACS) on HIV among MSM in Amsterdam was initiated in  
22 1984 [4, 5]. It is an open, prospective cohort study. Participants visit the facilities of  
23 ACS every six months. They complete self-administered questionnaires (with  
24 questions about socio-demographic characteristics, sexual behaviour, recreational  
25 drug use etc.) and they are tested for HIV and other STIs. In this study, we used the  
26 44<sup>th</sup> questionnaire completed by participants between January and June 2017,

27 because this specific questionnaire included also questions about the number of sex  
28 acts with each separate sexual partner.

- 29 • National HBV Vaccination Programme of Risk Groups. In 2002, a selective vaccination  
30 programme was initiated in the Netherlands, providing HBV vaccination free of charge  
31 for population subgroups at increased risk of HBV, including MSM, drug users,  
32 commercial sex workers, and heterosexuals who change partners frequently. MSM  
33 have been included in the programme since its start [1, 6]. The number of MSM  
34 receiving three doses of HBV vaccination are shown in Table S2 and were used for  
35 model validation (Figure S2). Furthermore, the numbers of vaccinations from March  
36 2020 were used to calculate the change in vaccination rates during the pandemic  
37 (Table 2 in main text).
- 38 • Online National System for Registration of Infectious Diseases (OSIRIS). OSIRIS is a  
39 national computer system where data from the whole country about diagnoses of  
40 infectious diseases are registered [7]. We used data from this database for the annual  
41 number of diagnoses of acute HBV for model fitting (Figure S2).
- 42 • National STI Surveillance Database (SOAP). In this database, surveillance data of STI  
43 consultations from all 26 STI clinics in the Netherlands are accumulated [8, 9]. STI  
44 clinics in the Netherlands provide free and anonymous STI testing for MSM. At each  
45 STI consultation, information on demographics, sexual behaviour, STI history of the  
46 past two years, and STI test results are registered. According to the current protocol,  
47 MSM are tested for HIV, HBV, syphilis, gonorrhoea, and chlamydia. From this  
48 database, we used the number of HBV tests to estimate the testing rates before the  
49 pandemic (Table S1) and the change in testing during the pandemic (Table 2 in main  
50 text). Testing rates were stratified according to sexual activity level based on the  
51 number of partners in the preceding six months (low activity: 0-2 partners;  
52 moderately high activity: 3-10 partners; very high activity: >10 partners).
- 53 • COVID-19, Sex, and Intimacy Survey: This online repeated cross-sectional survey  
54 assessed COVID-19-related changes in sexual activity, number and types of partners  
55 and condomless anal intercourse among adult MSM in the Netherlands [10, 11]. The

56 first round of data collection was carried out from end July to beginning of September  
57 2020 [10], with recruitment via social media advertisements on Facebook and  
58 Instagram. Respondents reported on their sexual-related behaviors during three two-  
59 month periods: before the first lockdown (January-February 2020), during the first  
60 lockdown (mid-March to mid-May 2020), and in the first relaxation period (following  
61 the first lockdown: mid-May to mid-July 2020). The model parameters accounting for  
62 the COVID-19-related change in sexual activity during the first lockdown and the first  
63 relaxation period were based on data from this survey round. In our previous  
64 publication [12], the parameters for sexual activity during the second lockdown were  
65 consensus estimates we established in consultation with experts working with the  
66 MSM population. In the present study, we used the same consensus estimates as  
67 they were validated by preliminary results from the second round of the COVID-19,  
68 Sex, and Intimacy Survey [11]. The second round was conducted in Spring 2021, and  
69 collected data on behaviours in five periods from January 1<sup>st</sup> 2020 until mid-February  
70 2021.

71

## 72 **S2. Model equations**

73 The model is described by the following system of ordinary differential equations, with  
74  $i = 1,2,3$  denoting the  $i$ -th sexual activity group:

$$75 \quad \frac{dX_i}{dt} = -(\lambda_i + \zeta_i + \pi_i + \mu)X_i + \mu N_i$$

$$76 \quad \frac{dV_i}{dt} = (\zeta_i + \pi_i)X_i - \mu V_i$$

$$77 \quad \frac{dZ_i}{dt} = (1 - \sigma)\theta_1(Y_{1i} + W_{1i}) + \sum_{k=2}^4 \theta_{kz}(Y_{ki} + W_{ki}) - \mu Z_i$$

$$78 \quad \frac{dY_{1i}}{dt} = (1 - f_s)\lambda_i X_i - (\theta_1 + \delta_1 + \gamma_i + \pi_i + \mu)Y_{1i}$$

$$79 \quad \frac{dY_{2i}}{dt} = \sigma\theta_1 Y_{1i} - (\theta_{23} + \theta_{24} + \theta_{2z} + \delta_2 + \gamma_i + \pi_i + \varphi_2 + \mu)Y_{2i} + \theta_{32} Y_{3i}$$

$$80 \quad \frac{dY_{3i}}{dt} = \theta_{23} Y_{2i} - (\theta_{32} + \theta_{3z} + \delta_3 + \gamma_i + \pi_i + \varphi_3 + \mu)Y_{3i}$$

$$81 \quad \frac{dY_{4i}}{dt} = \theta_{24}Y_{2i} - (\theta_{4z} + \theta_{45} + \delta_4 + \gamma_i + \pi_i + \varphi_4 + \mu + \mu_4)Y_{4i}$$

$$82 \quad \frac{dW_{1i}}{dt} = f_s \lambda_i X_i + (\delta_1 + \gamma_i + \pi_i)Y_{1i} - (\theta_1 + \mu)W_{1i}$$

$$83 \quad \frac{dW_{2i}}{dt} = \sigma \theta_1 W_{1i} + (\delta_2 + \gamma_i + \pi_i)Y_{2i} - (\theta_{23} + \theta_{24} + \theta_{2z} + \varphi_2 + \tau_2 + \mu)W_{2i} + \theta_{32}W_{3i}$$

$$84 \quad \frac{dW_{3i}}{dt} = \theta_{23}W_{2i} + (\delta_3 + \gamma_i + \pi_i)Y_{3i} - (\theta_{32} + \theta_{3z} + \varphi_3 + \mu)W_{3i}$$

$$85 \quad \frac{dW_{4i}}{dt} = \theta_{24}W_{2i} + (\delta_4 + \gamma_i + \pi_i)Y_{4i} - (\theta_{4z} + \theta_{45} + \varphi_4 + \tau_4 + \mu + \mu_4)W_{4i}$$

$$86 \quad \frac{dW_{5i}}{dt} = \theta_{45}(Y_{4i} + W_{4i}) - (\varphi_5 + \tau_5 + \mu + \mu_5)W_{5i}$$

$$87 \quad \frac{dW_{6i}}{dt} = \sum_{k=2}^4 \varphi_k (Y_{ki} + W_{ki}) + \varphi_5 W_{5i} + \varphi_T T_i - (\tau_6 + \mu + \mu_6)W_{6i}$$

$$88 \quad \frac{dT_i}{dt} = \tau_2 W_{2i} + \sum_{k=4}^6 \tau_k W_{ki} - (\varphi_T + \mu + \mu_T)T_i$$

89 The parameters and variables in these equations are explained in the following sections  
90 and in Tables 1 and S1.

91

### 92 **S3. The course of HBV infection**

93 In the model, MSM are divided into several classes according to state of HBV infection  
94 and immunity. First, we distinguish:

- 95 • Individuals who are uninfected and unvaccinated ( $X_i$ ).
- 96 • Individuals who are immune to HBV due to HBV vaccination ( $V_i$ ).
- 97 • Individuals who are immune to HBV after HBsAg seroconversion ( $Z_i$ ).
- 98 • Individuals infected with HBV who receive antiviral treatment and have suppressed  
99 viral load ( $T_i$ ).
- 100 • Individuals infected with HBV and not-immune; these are further subdivided into the  
101 following phases of HBV infection, according to international guidelines [13, 14]:  
102 1. Acute HBV infection, undiagnosed ( $Y_{1i}$ ) or diagnosed ( $W_{1i}$ ): a short period with  
103 very high levels of transmissibility. In adults, a small fraction  $\sigma$  of acute infections  
104 progresses to chronic infection, while the rest,  $1 - \sigma$ , clears the infection and  
105 becomes immune.

- 106 2. Active chronic HBV infection or chronic hepatitis B (CHB), undiagnosed ( $Y_{2i}$ ) or  
107 diagnosed ( $W_{2i}$ ): This phase is characterised by active replication of the virus,  
108 moderate to high levels of serum HBV DNA and of contagiousness, and elevated  
109 ALT. In this phase, individuals can be hepatitis B e-antigen (HBeAg) positive or  
110 negative, but mostly HBeAg-negative, since HBeAg-positive is rare among those  
111 infected as adults. Virus replication may get under control and individuals  
112 progress to the inactive phase. Individuals with active CHB can clear the infection  
113 or progress to cirrhosis or HCC. Treatment is indicated for those diagnosed.
- 114 3. Inactive chronic HBV infection, undiagnosed ( $Y_{3i}$ ) or diagnosed ( $W_{3i}$ ): This phase is  
115 asymptomatic and is characterised by the presence of serum antibodies to HBeAg  
116 (anti-HBe), undetectable or low HBV DNA levels, and normal ALT. Individuals in  
117 this phase can clear the infection, but they also have a low probability of  
118 progression to CHB or HCC.
- 119 4. Compensated cirrhosis, undiagnosed ( $Y_{4i}$ ) or diagnosed ( $W_{4i}$ ): In this phase, the  
120 liver is scarred but is still mostly able to perform its basic functions. Individuals  
121 often have no symptoms. Treatment is indicated for this phase.
- 122 5. Decompensated cirrhosis ( $W_{5i}$ ): In this phase, there is severe damage of the liver  
123 that can range up to liver failure. Individuals have clear clinical symptoms that  
124 lead to diagnosis and treatment is indicated in this phase.
- 125 6. Hepatocellular carcinoma (HCC) ( $W_{6i}$ ): This is a type of primary liver cancer.  
126 Individuals have clear clinical symptoms that lead to diagnosis. Treatment is  
127 indicated in this phase.

128 These classes and phases are further divided into three activity groups, based on sexual  
129 activity, denoted with the subscript  $i = 1,2,3$  (see details in section about the activity  
130 groups). Due to clinical symptoms with decompensated cirrhosis and HCC, we assumed  
131 that individuals in these phases are diagnosed. The other phases of acute and chronic  
132 HBV infection were distinguished into undiagnosed and diagnosed. All phases of chronic  
133 infection and cirrhosis can progress directly to HCC. Individuals with cirrhosis or HCC  
134 have an extra death rate ( $\mu_4, \mu_5, \mu_6$ ) due to HBV infection. All individuals with acute or

135 chronic infection or compensated cirrhosis have a probability to clear the infection and  
 136 become immune.

137

#### 138 **S4. Transmission of HBV**

139 Inactive chronic HBV infection is characterised by low levels of HBV DNA, therefore we  
 140 assumed that the probability of HBV transmission per act of CAI is the lowest during  
 141 inactive chronic infection. During active CHB and compensated cirrhosis, the level of  
 142 infectivity is higher than that during inactive chronic HBV, while the level of infectivity is  
 143 the highest during acute infection (Tables 1, S1). We assumed that individuals with  
 144 decompensated cirrhosis or HCC do not engage in sexual practices that enable HBV  
 145 transmission due to the severity of their health condition.

146

#### 147 **S5. Transmission rate**

148 The rate  $\lambda_i$  at which men in activity group  $i = 1,2,3$  get infected with HBV is defined by the  
 149 equation:

$$150 \quad \lambda_i = \alpha_{si} \sum_{j=1}^4 m_{sij} \frac{\sum_{k=1}^4 p_{skj}(Y_{kj} + W_{kj}) + p_{sTj}T_j}{N_j} + \alpha_{ci} \sum_{j=1}^4 m_{cij} \frac{\sum_{k=1}^4 p_{ckj}(Y_{kj} + W_{kj}) + p_{cTj}T_j}{N_j}$$

151 In these equations,

- 152 •  $p_{skj} = 1 - (1 - \omega_j \beta_k)^{u_{sj}}$  and  $p_{ckj} = 1 - (1 - \omega_j \beta_k)^{u_{cj}}$  are the probabilities of HBV  
 153 transmission per steady and per casual partner, respectively, per year, if the infected  
 154 partner is in state  $k = 1,2,3,4$  of infection and from activity group  $j = 1,2,3$ ;  $p_{sTj} = 1 -$   
 155  $(1 - \omega_j \beta_T)^{u_{sj}}$  and  $p_{cTj} = 1 - (1 - \omega_j \beta_T)^{u_{cj}}$  are the respective probabilities of transmission  
 156 from an infected partner under treatment.
- 157 •  $\beta_k$  is the probability of HBV transmission per act of CAI if the infected partner is in  
 158 state  $k = 1,2,3,4$  of infection.
- 159 •  $\omega_j$  is a factor decreasing the probability to acquire HBV due to antiretroviral agents  
 160 that reduce HBV acquisition. This reduction is due to antiretroviral treatment for HIV  
 161 infection:  $\omega_j = h_j c_j \psi_c + 1 - h_j c_j$ , where  $h_j$  is the HIV prevalence in activity group  $j$ ;  $c_j$  is

162 the fraction of HIV-infected MSM that is diagnosed and receives cART containing  
 163 lamivudine, emtricitabine, and/or tenofovir, and  $\psi_c$  is the reduction in the probability  
 164 to acquire HBV infection due to these antiretroviral agents [15, 16].

- 165 •  $u_{sj}, u_{cj}$  are the frequencies of CAI with steady and casual partners, respectively, if the  
 166 infected individual is from activity group  $j = 1,2,3$ .
- 167 •  $\alpha_{sj}$  and  $\alpha_{cj}$  are the numbers of steady and casual partners per year, respectively, of  
 168 men in activity group  $j = 1,2,3$ .
- 169 •  $N_j$  is the total size of activity group  $j = 1,2,3$ :  $N_j = X_j + V_j + Z_j + T_j + \sum_{k=1}^4 Y_{kj} + \sum_{k=1}^6 W_{kj}$ .
- 170 •  $m_{sij}$  and  $m_{cij}$  are parameters that define the level of mixing between activity groups  
 171  $i, j = 1,2,3$ , when forming steady and casual partnerships, respectively. These are  
 172 defined by the equations:

$$173 \quad m_{sij} = \varepsilon_s \delta_{ij} + (1 - \varepsilon_s) \frac{\alpha_{sj} N_j}{\sum_{v=1}^3 \alpha_{sv} N_v} \quad \text{and} \quad m_{cij} = \varepsilon_c \delta_{ij} + (1 - \varepsilon_c) \frac{\alpha_{cj} N_j}{\sum_{v=1}^3 \alpha_{cv} N_v},$$

174 where  $\delta_{ij}$  is the Kronecker delta (being equal to 1, if  $i = j$ ; and equal to 0, otherwise)  
 175 and the parameters  $\varepsilon_s, \varepsilon_c$  determine the level of assortativeness in mixing of activity  
 176 groups when forming steady and casual partnerships, respectively (if  $\varepsilon_i = 1$ , then  
 177 mixing is assortative; if  $\varepsilon_i = 0$ , then mixing is proportionate).

178

## 179 **S6. Sexual behaviour and sexual activity groups**

180 We assumed that MSM can form steady relationships and have sex contacts with casual  
 181 partners. Based on their number of partners, MSM were divided into three sexual activity  
 182 groups: low, moderately high, and very high activity. MSM in the moderately and very  
 183 high activity groups are referred to as high-activity MSM. MSM in each sexual activity  
 184 group have different frequency of condomless anal intercourse (CAI) with their steady  
 185 and casual partners, different rates of HBV testing, and different vaccination rates. Input  
 186 parameters for the three sexual activity groups are shown in Table S1. Earlier studies  
 187 have indicated that there must have been a decrease in sexual risk behaviour around the  
 188 years 2002-2005 [17, 18]. To accommodate for such a change, we included in the model  
 189 a decline in the frequency of CAI in 2002. CAI frequency from 2002 onwards was

190 obtained from ACS data. The frequency before 2002 was obtained by multiplying the  
191 frequency after 2002 by a factor (greater than 1) that was obtained from the fitting  
192 procedure.

193

#### 194 **S7. Size of MSM population**

195 The total number of MSM in the Netherlands (size of the MSM population) was used in  
196 our calculations because the numbers of HBV infections, diagnoses, and vaccinations  
197 from the model and from the data have to be both divided by the total number of MSM to  
198 be comparable. Estimates of the size of the MSM population vary from 111,072 [19] to  
199 392,000 [20]. The differences in the estimates depend on the year the estimate was  
200 made, the ages included (for example, 15-65 or 15-70 years), and the definition of MSM  
201 (men who had sex with men in the previous six/twelve months; or ever had sex with  
202 men; or men who identify themselves as homosexual/bisexual). We use the range  
203 144,521 – 263,309 for the total number of MSM in the Netherlands [21]. We present  
204 results as % of the population or as numbers per 100,000 MSM per year.

205

#### 206 **S8. Vaccination via National HBV Vaccination Programme of Risk Groups**

207 Individuals not yet infected with HBV can be vaccinated at a rate  $\zeta_i$ , that was estimated  
208 based on data from the National HBV Vaccination Programme of Risk Groups [1, 6, 22].  
209 This was zero up to 2002. From 2003 onwards, the vaccination rates  $\zeta_i$  for activity group  
210  $i = 1,2,3$ , were calculated from the following equations:

211

$$212 \quad \zeta_i(t) = f_v(t) * v, \quad i = 1,$$

$$213 \quad \zeta_i(t) = f_v(t) * v * h, \quad i = 2,3.$$

214

215 The value of  $v$  was sampled from the Uniform distribution between 1% and 2%. The  
216 factor  $h$  increases the vaccination rate of men in the moderately and very high activity  
217 groups compared to that of men in the low activity group [23]. The function  $f_v(t) = 1.28 +$   
218  $0.03t$  expresses the annual increase in the vaccination rate in year  $t$ , necessary to mimic



219 the increase in the actual number of vaccinations obtained from data. The values of these  
220 parameters are given in Tables S1-S2. For example, in the first year, the vaccination rate  
221 in the low-activity group was  $1.28 * v$ , in the second year it was  $(1.28 + 0.03) * v$ , etc. The  
222 vaccination rate  $\zeta_i$  is applied to the susceptible (unvaccinated and uninfected) population,  
223 not the whole MSM population. Since the size of the susceptible population declines in  
224 time (as more and more MSM get vaccinated every year), if we had used a constant  
225 vaccination rate (2%, for example), that would have resulted in a declining number of  
226 MSM getting vaccinated every year. Since the data show an increasing number of  
227 vaccinations among MSM in time (Figure S2b and Table S2), we used an increasing  
228 vaccination rate to mimic the increase in the number of vaccinations from the data. Data  
229 on the number of MSM vaccinated annually were obtained from the National HBV  
230 Vaccination Programme of Risk Groups. We used only the number of MSM who had  
231 completed the three-dose HBV vaccination in each calendar year. These numbers were  
232 divided by the estimate of the size of the MSM population, to obtain the number of  
233 vaccinations expressed as number of MSM vaccinated against HBV per 100,000 MSM per  
234 year (Table A2). It was assumed that those vaccinated are completely protected against  
235 HBV infection and immunity lasts for life [24-28].

236

### 237 **S9. Testing, diagnosis, and treatment of HBV infection**

238 The rate of diagnosis of HBV infection depends on the presence of symptoms, but also on  
239 rates of opportunistic testing for STIs in general. Nowadays, most STI clinics in the  
240 Netherlands offer an "STI test" that includes tests for HIV, HBV, chlamydia, gonorrhoea,  
241 and syphilis. Some MSM seeking testing may have symptoms (possibly for an infection  
242 other than HBV), while others seek testing because regular STI testing every six months  
243 is recommended for MSM. We calculated rates of HBV testing based on data from the  
244 National Database of STI clinics. The reason for testing was not recorded in these data.  
245 Therefore, we used a "general" testing rate without distinguishing for reasons for testing.  
246 The testing rate  $\gamma_i$  depends on the sexual activity group of the man  $i=1,2,3$ . Since the  
247 number of HBV tests among MSM has increased in the recent years [8], we assumed an

248 increase in HBV testing starting in 2002 (Table S1). Furthermore, we assumed that a  
249 fraction  $f_s$  of individuals with acute HBV infection has clear clinical symptoms, seek  
250 testing, and are reported as acute infections. Due to the severity of decompensated  
251 cirrhosis and HCC, we assumed that individuals in these phases are all under some form  
252 of treatment or therapy, including chemotherapy, radiation therapy, and/or liver  
253 transplantation for HCC.

254

255 Antiviral treatment is indicated for individuals diagnosed with active CHB or compensated  
256 cirrhosis and most treated individuals achieve viral suppression. In the model, these  
257 individuals “progress” to the state  $T$  that includes those under antiviral treatment and  
258 virally suppressed. This occurs at a treatment rate  $\tau$ , that depends on the fraction of  
259 diagnosed engaged in care, the fraction of those engaged in care who do start treatment,  
260 and the fraction of those treated who achieve viral suppression. Treatment has the  
261 following three effects for those achieving viral suppression: (a) the probability that they  
262 transmit HBV per act of CAI is reduced; (b) the rate of progressing to cirrhosis and HCC  
263 is reduced; and (c) the additional mortality rate due to HBV infection is reduced  
264 (compared to the respective probability and rates for those untreated). Guidelines for the  
265 treatment of HBV infection have been updated through the years: the indications (which  
266 patients should be treated) have become less restrictive and more effective antiviral  
267 agents are recommended as first-line therapy. The current treatment guidelines in the  
268 Netherlands were updated in 2012 by the Dutch Association of Gastrointestinal Liver  
269 Physicians [29]. According to these guidelines, all individuals with active CHB or cirrhosis  
270 are eligible for treatment; tenofovir, peginterferon, and entecavir are the recommended  
271 antiviral agents. Since the use of third generation antiviral agents has been increasing in  
272 the recent years in the Netherlands [30], we included in our analyses two treatment  
273 rates: the “old” treatment rates for the years up to and including 2011 and the “new”  
274 treatment rates from year 2012 onwards (Table 1).

275

276

277 **S10. The impact of HIV treatment on acquisition of HBV**

278 The prevalence of HIV infection was assumed to be 3-7%, 6-14%, and 9-21% in the low,  
279 moderately high, and very high activity groups, respectively. These were based on the  
280 estimates of HIV prevalence of 15% among MSM attending STI clinics and 5-10% among  
281 MSM not attending STI clinics in the Netherlands [21]. Among HIV infected MSM, the  
282 percentage diagnosed was assumed to be 75%, 82%, and 90% in the low, moderately  
283 high, and very high activity groups, respectively. These estimates were based on the  
284 estimates of the percentage undiagnosed of 10% (95% credible interval, 5-30%) among  
285 STI-clinic attendees and 35% (95% credible interval, 15-55%) among non-STI clinic  
286 attendees [21]. We assumed that 75% of diagnosed HIV-infected MSM receives  
287 antiretroviral therapy containing HBV-related antiretroviral agents (lamivudine,  
288 emtricitabine, or tenofovir) and, for these individuals, the probability to acquire HBV per  
289 CAI act is only 0.1 times the probability for those not receiving such antiretroviral agents.  
290 This is based on the findings that antiretroviral regimens with anti-HBV activity can  
291 reduce HBV incident infections by 90% [15, 16].

292

293 **S11. Model fitting and validation**

294 Using Latin Hypercube Sampling [31], 5,000 combinations of values of model parameters  
295 were sampled. The model calculations for the years until and including 2019 were  
296 repeated with these parameter combinations and with rates of HBV vaccination, testing,  
297 and treatment as before the pandemic. The number of diagnoses of acute HBV infections  
298 per 100,000 MSM per year was calculated from the model (with each of the 5,000  
299 parameter sets) and from the data (obtained from OSIRIS). To compare the numbers of  
300 diagnoses from the data and from the model, the numbers from the data were expressed  
301 in numbers per 100,000 MSM per year, by dividing the number of diagnoses in a specific  
302 year by the total number of MSM in the Netherlands. We used a range of 144,521-  
303 263,309 MSM [21], resulting in a low estimate (dividing by 263,309 MSM) and a high  
304 estimate (dividing by 144,521 MSM) of diagnoses per 100,000 MSM. The parameter  
305 combinations that resulted in number of diagnoses (from the model) within the range

306 determined by the data were selected (182 parameter combinations) and used in the  
307 model calculations from 2020 onwards. For validation, the model results were compared  
308 with data on: (a) the number of MSM that received three-dose HBV vaccination per year  
309 in 2003-2018; these numbers were obtained from the National HBV Vaccination  
310 Programme of Risk Groups (Figure S2b, Table S2) and were scaled to numbers of  
311 vaccinations per 100,000 MSM per year, by dividing with the two estimates (144,521 and  
312 263,309) of the size of the MSM population, as explained above; (b) estimates of the  
313 percentage of MSM hepatitis B surface antigen (HBsAg) positive and the percentage  
314 hepatitis B core antibody (anti-HBc) positive, obtained from different studies (Figure S3  
315 and Table S3).

316

317 **Table S1.** Parameters that depend on the sexual activity group of individuals.

|                                                                                                         |               | Activity group |                  |                  |
|---------------------------------------------------------------------------------------------------------|---------------|----------------|------------------|------------------|
|                                                                                                         |               | Low            | Moderately high  | Very high        |
| Parameter for activity group $i = 1, 2, 3$                                                              |               | 1              | 2                | 3                |
| % of MSM in specific activity group <sup>a</sup>                                                        |               | 58%            | 26%              | 16%              |
| Number of new steady partners per year <sup>b</sup>                                                     | $\alpha_{si}$ | 0.1            | 0.2              | 0.7              |
| Number of casual partners per year <sup>a</sup>                                                         | $\alpha_{ci}$ | 0.75           | 9.12             | 41.15            |
| Number of CAI acts per steady partner per year <sup>a</sup>                                             | $u_{si}$      | 28             | 17               | 30               |
| Number of CAI acts per casual partner per year <sup>a</sup>                                             | $u_{ci}$      | 0.01           | 0.04             | 0.38             |
| Vaccination rates <sup>c</sup>                                                                          | $\zeta_i$     | $f_v(t) * v$   | $f_v(t) * v * h$ | $f_v(t) * v * h$ |
| Average interval between opportunistic HBV tests (outside PrEP programme), in years <sup>d</sup>        |               |                |                  |                  |
| Before 2002                                                                                             | $1/\gamma_i$  | 10             | 5                | 3                |
| From 2002 onwards                                                                                       | $1/\gamma_i$  | 3-7            | 1.5-2            | 0.5-1            |
| HIV prevalence (% of each activity group infected with HIV) [17]                                        | $h_i$         | 3-7%           | 6-14%            | 9-21%            |
| % of HIV-infected MSM being diagnosed and receiving antiretroviral therapy with HBV-related agents [17] | $c_i$         | 53-59%         | 59-65%           | 65-71%           |

318 <sup>a</sup> Based on data from the Amsterdam Cohort Study (ACS) among MSM in Amsterdam [4, 5].

319 <sup>b</sup> The number of steady partners per year was calculated as  $1/d$ , where  $d$  was the duration (in  
320 years) of steady partnerships in each activity group. The durations were assumed and not  
321 estimated from ACS, because MSM without sexual partners and MSM with very long steady  
322 relationships are underrepresented in ACS.

323 <sup>c</sup> The value of  $v$  was sampled from the uniform distribution between 1% and 2%, based on an  
324 annual vaccination coverage of 2% until 2010 [22]. The rate of annual increase in vaccinations was  
325  $f_v(t) = 1.28 + 0.03t$ . The factor  $h$  describes the increased vaccination rate of moderately high and  
326 very high activity groups compared to that of low activity group; its value was sampled from the  
327 uniform distribution between 10% and 20%.

328 <sup>d</sup> Based on data from the National Database of STI clinics [8, 9].

329

330 **Table S2.** Number of MSM vaccinated against HBV, as obtained from data from the National HBV  
 331 Vaccination Programme of Risk Groups [1, 6, 22].

| Year | Actual number of vaccinations <sup>a</sup> | Estimate of number of vaccinations per 100,000 MSM per year <sup>a</sup> |                  |
|------|--------------------------------------------|--------------------------------------------------------------------------|------------------|
|      |                                            | Low estimate                                                             | High estimate    |
| 2002 | 16                                         |                                                                          |                  |
| 2003 | 1392                                       | 535 <sup>b</sup>                                                         | 974 <sup>b</sup> |
| 2004 | 2617                                       | 994                                                                      | 1811             |
| 2005 | 2228                                       | 846                                                                      | 1542             |
| 2006 | 2423                                       | 920                                                                      | 1677             |
| 2007 | 2524                                       | 959                                                                      | 1746             |
| 2008 | 2657                                       | 1009                                                                     | 1838             |
| 2009 | 2776                                       | 1054                                                                     | 1921             |
| 2010 | 2525                                       | 959                                                                      | 1747             |
| 2011 | 2546                                       | 967                                                                      | 1762             |
| 2012 | 2355                                       | 894                                                                      | 1630             |
| 2013 | 2693                                       | 1023                                                                     | 1863             |
| 2014 | 2888                                       | 1097                                                                     | 1998             |
| 2015 | 2810                                       | 1067                                                                     | 1944             |
| 2016 | 3083                                       | 1171                                                                     | 2133             |
| 2017 | 3101                                       | 1178                                                                     | 2146             |
| 2018 | 3177                                       | 1207                                                                     | 2198             |
| 2019 | 3317                                       | 1260                                                                     | 2295             |

332 <sup>a</sup> The actual number of vaccinations is the number of MSM who had completed the three-dose HBV  
 333 vaccination in the respective year. The number of vaccinations per 100,000 MSM per year was  
 334 obtained by dividing the actual number of vaccinations by the number of MSM in the Netherlands,  
 335 estimated in the range 144,521 – 263,309 MSM [21].

336 <sup>b</sup> Risk-group vaccination was initiated in 2002 and only 16 MSM had completed the three-dose  
 337 vaccination in the first year of the programme. Therefore, we assumed that the vaccination rate  
 338 was zero in 2002 and the vaccination rate in 2003 was obtained using as actual number of  
 339 vaccinations in 2003 the number of vaccinations in 2003 plus that in 2002 (16+1392=1408).  
 340

341 **Table S3.** Data for model fitting.

| <b>Outcome</b>                                                                                                               | <b>Value</b>  | <b>Source</b>                                                  |
|------------------------------------------------------------------------------------------------------------------------------|---------------|----------------------------------------------------------------|
| Diagnoses acute HBV infection                                                                                                | See Figure S2 | National Database OSIRIS [7]                                   |
| Number of MSM with 3-dose HBV vaccination                                                                                    | See Figure S2 | National HBV Vaccination Programme of Risk Groups [1, 22]      |
| <b>% HBsAg</b>                                                                                                               |               |                                                                |
| Among MSM presenting for vaccination at the National HBV Vaccination Programme of Risk Groups, average over years 1998-2011  | 0.6-0.7%      | [22]                                                           |
| Among MSM presenting for vaccination at National HBV Vaccination Programme of Risk Groups, average over years 2002-2005      | 0.7-1.3%      | Data National HBV Vaccination Programme of Risk Groups [1, 22] |
| Among MSM reporting to initiate PrEP at the Amsterdam PrEP Demonstration Project, 2015                                       | 0.5%          | [32]                                                           |
| Estimate for MSM in 2016, using a modified workbook method                                                                   | 0.46-1.58%    | [33]                                                           |
| <b>% anti-HBc positive</b>                                                                                                   |               |                                                                |
| Among MSM presenting for vaccination at the National HBV Vaccination Programme of Risk Groups, average over years 1998-2011  | 11%           | [22]                                                           |
| Among MSM presenting for vaccination at the National HBV Vaccination Programme of Risk Groups, average over years 2002-2005: | 13-16%        | Data National HBV Vaccination Programme of Risk Groups [1, 22] |
| Among MSM participating at an online survey of Rutgers Group in 2014, % reporting every having had HBV infection             | 8%            | [34]                                                           |
| Among ACS participants in 2017                                                                                               | 11%           | ACS data [5]                                                   |

342 Abbreviations: HBV, hepatitis B virus; MSM, men who have sex with men; OSIRIS, Online National  
 343 System for Registration of Infectious Diseases; HBsAg, hepatitis B surface antigen; anti-HBc,  
 344 hepatitis B core antibody, PrEP, pre-exposure prophylaxis; ACS, Amsterdam Cohort Study.  
 345

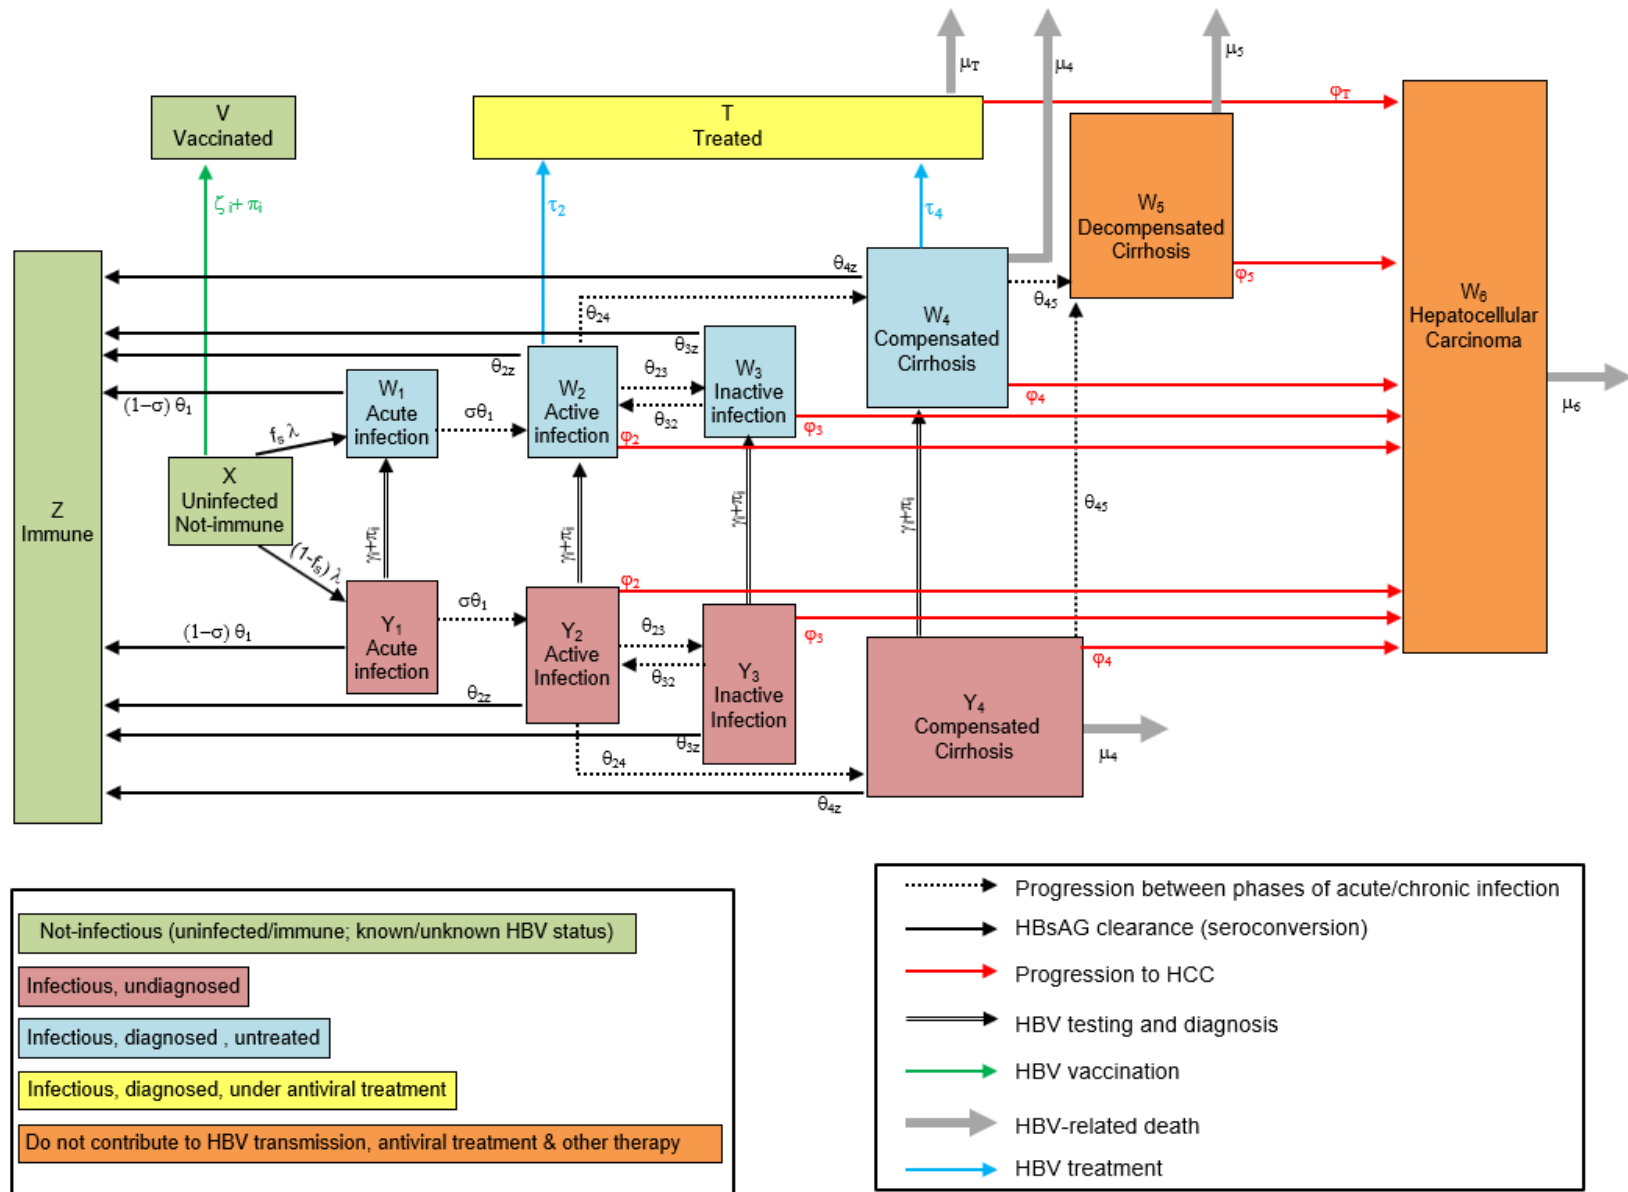

346

347

Figure S1. Flow diagram of the model of HBV transmission and progression.



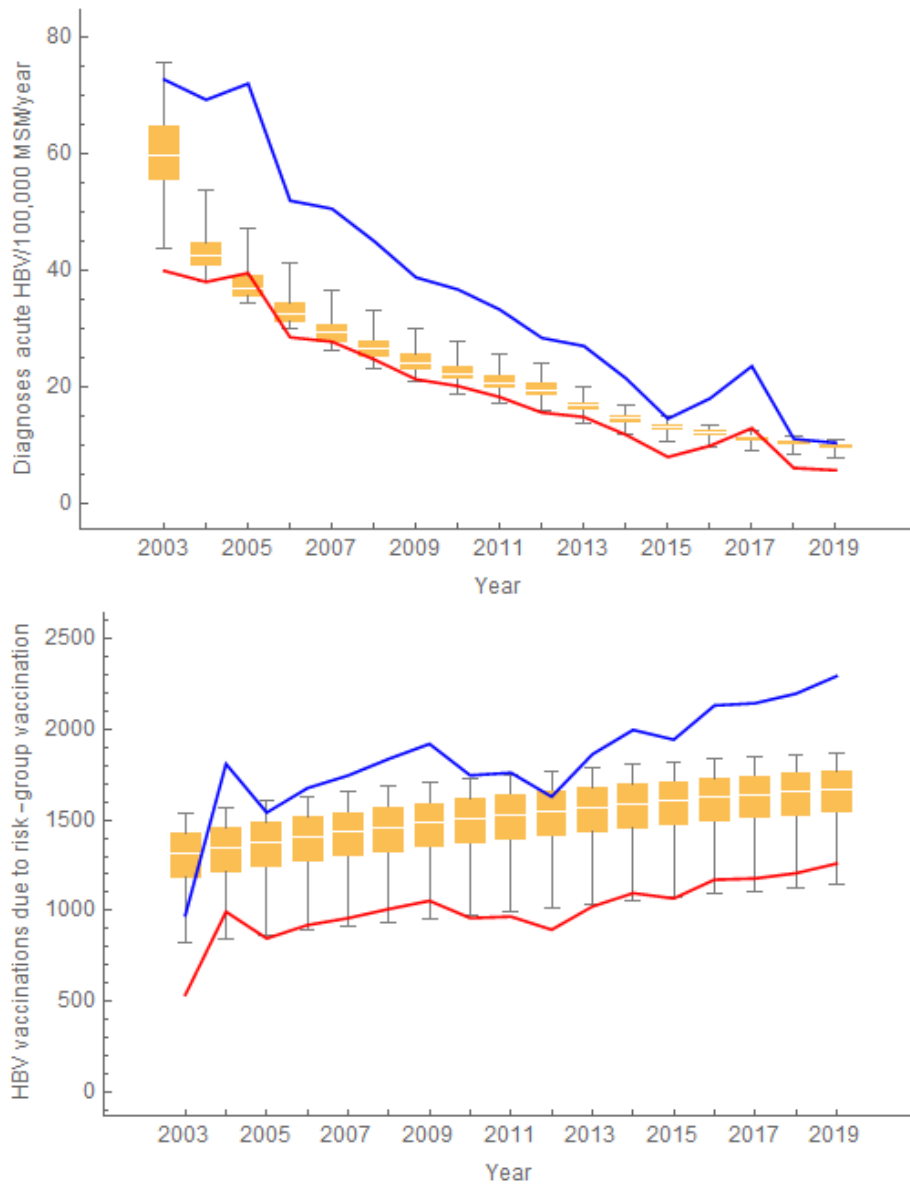

348 **Figure S2.** (a) Model fit to data on the number of diagnoses of acute HBV per 100,000 MSM per  
 349 year. Data were obtained from the Online National System for Registration of Infectious Diseases  
 350 (OSIRIS). (b) The number of HBV vaccinations among MSM per 100,000 MSM per year. Data from  
 351 the National HBV Vaccination Programme of Risk Groups. In both plots: the red and blue lines  
 352 show, respectively, the low and high estimates from the data, obtained by dividing the actual  
 353 number (of diagnoses or vaccinations) by the high estimate (263,309) or the low estimate  
 354 (144,521) of the total number of MSM in the Netherlands. The box plots show the respective  
 355 numbers from the model; the white line shows the median, the orange box the interquartile range,  
 356 and the black line segments show the whole range of the results with the selected parameters.  
 357 MSM, men who have sex with men; HBV, hepatitis B virus.

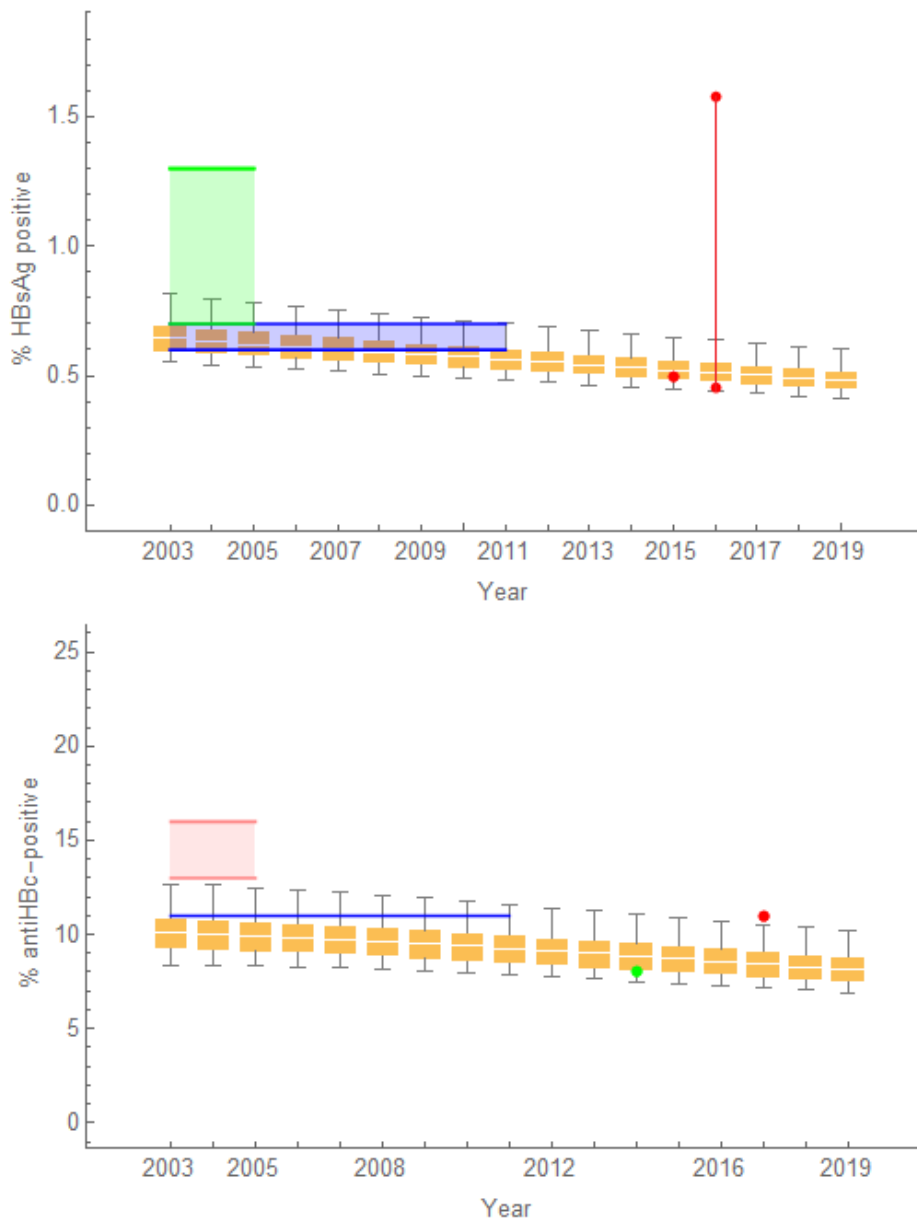

358 **Figure S3.** Results from the model and from data. (a) Percentage of MSM population being HBsAg  
 359 positive. From the model, this is  $\sum_{i,j}(Y_{ij} + W_{ij} + T_i) / N$ . The data shown are: 0.6-0.7% in 2003-2011  
 360 (blue lines and blue shaded area); 0.7-1.3% in 2003-2005 (green lines and green shaded area);  
 361 0.5% in 2015; and 0.46-1.58% in 2016 (red points and line). (b) Percentage of MSM population  
 362 being anti-HBc positive. From the model this is  $\sum_{i,j}(Y_{ij} + W_{ij} + T_i + Z_i) / N$ . The data shown are: 11%  
 363 in 2003-2011 (blue line); 13-16% in 2003-2005 (pink lines and shaded area); 8% in 2014 (green  
 364 point); and 11% in 2017 (red point). Data are explained in Table S3. In both plots, the orange box  
 365 plots show the numbers from the model in each calendar year; the white line shows the median,  
 366 the orange box the interquartile range, and the black line segments show the whole range of the  
 367 results with the selected parameters. MSM, men who have sex with men; HBV, hepatitis B virus;  
 368 HBsAg, hepatitis B surface antigen; anti-HBc, hepatitis B core antibody.

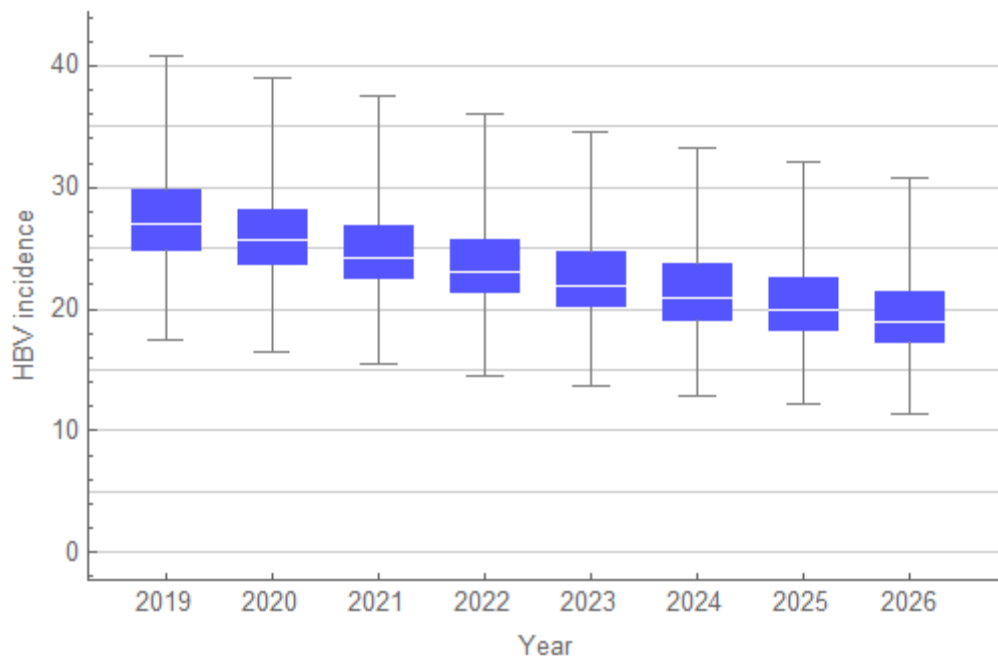

369

370 **Figure S4.** The incidence of hepatitis B virus (HBV) infections among men who have sex with men  
 371 (MSM) in the Netherlands in 2019-2026 for the reference scenario showing the situation if the  
 372 COVID-19 pandemic and related changes had not occurred. The incidence is presented as number  
 373 of new HBV infections per 100,000 MSM per year. The white line segments show the median, the  
 374 blue boxes show the interquartile range, and the black line segments show the whole range of  
 375 model results with the selected parameters

376

377

378 **References**

- 379 1. Mangen MJ, Stibbe H, Urbanus A, Siedenburg EC, Waldhober Q, de Wit GA, van  
380 Steenbergen JE: **Targeted outreach hepatitis B vaccination program in high-**  
381 **risk adults: The fundamental challenge of the last mile.** *Vaccine* 2017,  
382 **35**(24):3215-3221.
- 383 2. Meiberg AE, Urbanus AT: **How to reach high behavioral risk groups for HBV-**  
384 **vaccination: combining offline and online strategies.** *Conference of the*  
385 *European Public Health Association.* Marseille; 2019. Poster presentation.
- 386 3. Xiridou M, Visser M, Urbanus A, Matser A, van Benthem B, Veldhuijzen I: **Ending**  
387 **risk-group HBV vaccination for MSM after the introduction of universal**  
388 **infant HBV vaccination: A mathematical modelling study.** *Vaccine* 2021,  
389 **39**(21):2867-2875.
- 390 4. van Griensven F, Tielman RA, Goudsmit J, van der Noordaa J, de Wolf F, de Vroome  
391 EM, et al: **Risk factors and prevalence of HIV antibodies in homosexual men**  
392 **in the Netherlands.** *Am J Epidemiol* 1987, **125**:1048-1057.
- 393 5. Heijman T, Geskus RB, Davidovich U, Coutinho RA, Prins M, Stolte IG: **Less**  
394 **decrease in risk behaviour from pre-HIV to post-HIV seroconversion among**  
395 **MSM in the combination antiretroviral therapy era compared with the pre-**  
396 **combination antiretroviral therapy era.** *AIDS* 2012, **26**(4):489-495.
- 397 6. National Institute of Public Health and the Environment (RIVM): **The National**  
398 **Immunisation Programme in the Netherlands. Surveillance and**  
399 **developments in 2020-2021.** *Report 2021-0055.* Edited by Pluijmaekers AJM, de  
400 Melker HE. Bilthoven: National Institute of Public Health and the Environment; 2021.  
401 Available at: [https://www.rivm.nl/en/national-immunisation-](https://www.rivm.nl/en/national-immunisation-programme/surveillance-and-developments)  
402 [programme/surveillance-and-developments.](https://www.rivm.nl/en/national-immunisation-programme/surveillance-and-developments) Accessed: 14 January 2022.

- 403 7. **Online National System of Registration of Infectious Diseases (OSIRIS).**  
404 [<https://www.rivm.nl/sniv/handleiding-osiris>].
- 405 8. Staritsky LE, Visser M, van Aar F, Op de Coul E, Heijne J, van Wees D, Kusters J,  
406 Alexiou Z, de Vries A, Gotz HM *et al*: **Sexually transmitted infections in the**  
407 **Netherlands in 2020. Report number 2021-0052.** *National Institute of Public*  
408 *Health and the Environment, Bilthoven, The Netherlands, 2021.*  
409 DOI: 10.21945/RIVM-2021-0052. Available at:  
410 <https://rivm.openrepository.com/bitstream/handle/10029/625007/2021-0052.pdf>.  
411 Accessed: 14 January 2022.
- 412 9. Visser M, Heijne JCM, Hogewoning AA, van Aar F: **Frequency and determinants of**  
413 **consistent STI/HIV testing among men who have sex with men testing at**  
414 **STI outpatient clinics in the Netherlands: a longitudinal study.** *Sex Transm*  
415 *Infect* 2017, **93**(6):396-403.
- 416 10. Adam PCG, Op de Coul ELM, Zuilhof W, Zantkuijl P, den Daas C, de Wit JBF:  
417 **Changes in MSM's sexual activity, PrEP use, and access to HIV/STI testing**  
418 **during and after the first Dutch COVID-19 lockdown.** *STI and HIV World*  
419 *Congress, Amsterdam, 14-17 July 2021.* 2021.
- 420 11. Adam PCG, Zuilhof W, Den Daas C, Op de Coul E, Zantkuijl P, Paolucci J, Ketsuwan I,  
421 de Wit J: **Reduction in the magnitude of COVID-19-associated changes in**  
422 **sexual activity and disruption in HIV/STI testing or PrEP use among MSM**  
423 **responding to the 2nd COVID-19, sex and intimacy survey.** *National*  
424 *Conference on HIV.* Virtual; 2021. Oral presentation.
- 425 12. Xiridou M, Heijne J, Adam P, Op de Coul E, Matser A, de Wit J, Wallinga J, van  
426 Benthem B: **How the disruption in STI care due to the COVID-19 pandemic**  
427 **could lead to increased STI transmission among MSM in the Netherlands: a**  
428 **mathematical modelling study.** *Sex Transm Dis* 2022, **49**(2):145-53.

- 429 13. European Association for the Study of the Liver: **EASL 2017 clinical practice**  
430 **guidelines on the management of hepatitis B virus infection.** *J Hepatol* 2017,  
431 **67**: 370-398.
- 432 14. World Health Organization: **Guidelines for the prevention, care and treatment**  
433 **of persons with chronic hepatitis B infection.** Geneva; 2015. Available at:  
434 <https://www.who.int/hiv/pub/hepatitis/hepatitis-b-guidelines/en/>. Accessed: 14  
435 January 2022.
- 436 15. Gatanaga H, Hayashida T, Tanuma J, Oka S: **Prophylactic effect of antiretroviral**  
437 **therapy on hepatitis B virus infection.** *Clin Infect Dis* 2013, **56**(12):1812-1819.
- 438 16. Heuft MM, Houba SM, van den Berk GE, Smitsaert van de Haere T, van Dam AP,  
439 Dijkman LM, Regez RM, Brinkman K: **Protective effect of hepatitis B virus-**  
440 **active antiretroviral therapy against primary hepatitis B virus infection.**  
441 *AIDS* 2014, **28**(7):999-1005.
- 442 17. van Sighem A, Nakagawa F, De Angelis D, Quinten C, Bezemer D, de Coul EO, Egger  
443 M, de Wolf F, Fraser C, Phillips A: **Estimating HIV Incidence, Time to Diagnosis,**  
444 **and the Undiagnosed HIV Epidemic Using Routine Surveillance Data.**  
445 *Epidemiology* 2015, **26**(5):653-660.
- 446 18. Xiridou M, van Houdt R, Hahné S, Coutinho R, van Steenberghe J, Kretzschmar M:  
447 **Hepatitis B vaccination of men who have sex with men in the Netherlands:**  
448 **should we vaccinate more men, younger men or high-risk men?** *Sex Transm*  
449 *Infect* 2013, **89**(8):666-671.
- 450 19. Marcus U, Hickson F, Weatherburn P, Schmidt AJ: **Estimating the size of the MSM**  
451 **populations for 38 European countries by calculating the survey-**  
452 **surveillance discrepancies (SSD) between self-reported new HIV diagnoses**  
453 **from the European MSM internet survey (EMIS) and surveillance-reported**  
454 **HIV diagnoses among MSM in 2009.** *BMC Public Health* 2013, **13**:919.

- 455 20. Rutgers NISSO Group: **Sexual health in the Netherlands**. Delft: Eburon; 2006.
- 456 21. Op de Coul EL, Schreuder I, Conti S, van Sighem A, Xiridou M, Van Veen MG, Heijne  
457 JC: **Changing Patterns of Undiagnosed HIV Infection in the Netherlands:  
458 Who Benefits Most from Intensified HIV Test and Treat Policies?** *PLoS One*  
459 2015, **10**(7):e0133232.
- 460 22. Hahné S, van Houdt R, Koedijk F, van Ballegooijen M, Cremer J, Bruisten S, Coutinho  
461 R, Boot H: **Selective hepatitis B virus vaccination has reduced hepatitis B  
462 virus transmission in the Netherlands.** *PLoS One* 2013, **8**(7):e67866.
- 463 23. Den Daas C, Adam PCG, Vermey K, Zuilhof W, de Wit JBF: **Factors associated with  
464 self-reported hepatitis B virus vaccination status among men who have sex  
465 with men in the Netherlands.** *Sex Health* 2020, **17**(5):444-452.
- 466 24. Dentinger CM, McMahon BJ, Butler JC, Dunaway CE, Zanis CL, Bulkow LR, Bruden  
467 DL, Nainan OV, Khristova ML, Hennessy TW *et al*: **Persistence of antibody to  
468 hepatitis B and protection from disease among Alaska natives immunized at  
469 birth.** *Pediatr Infect Dis J* 2005, **24**(9):786-792.
- 470 25. Durlach R, Laugas S, Freuler CB, Rodriguez VE, Costa M: **Ten-year persistence of  
471 antibody to hepatitis B surface antigen in healthcare workers vaccinated  
472 against hepatitis B virus, and response to booster vaccination.** *Infect Control  
473 Hosp Epidemiol* 2003, **24**(10):773-776.
- 474 26. Floreani A, Baldo V, Cristofolletti M, Renzulli G, Valeri A, Zanetti C, Trivello R: **Long-  
475 term persistence of anti-HBs after vaccination against HBV: an 18 year  
476 experience in health care workers.** *Vaccine* 2004, **22**(5-6):607-610.
- 477 27. Gabbuti A, Romanò L, Blanc P, Meacci F, Amendola A, Mele A, Mazzotta F, Zanetti  
478 AR: **Long-term immunogenicity of hepatitis B vaccination in a cohort of  
479 Italian healthy adolescents.** *Vaccine* 2007, **25**(16):3129-3132.

- 480 28. Isken LD, Zaaijer HL, van Steenbergen JE: **[Hepatitis B revaccination not**  
481 **indicated, even for those at increased risk]**. *Ned Tijdschr Geneesk* 2009,  
482 **153**:A415.
- 483 29. Dutch Association of Gastrointestinal Liver Physicians: **Guidelines treatment of**  
484 **chronic hepatitis B virus infection**. 2012. Available at:  
485 [https://www.mdl.nl/sites/www.mdl.nl/files/richtlijnen/Richtlijn\\_HBV\\_nieuwe\\_inzichte](https://www.mdl.nl/sites/www.mdl.nl/files/richtlijnen/Richtlijn_HBV_nieuwe_inzichten_2012.pdf)  
486 [n\\_2012.pdf](https://www.mdl.nl/sites/www.mdl.nl/files/richtlijnen/Richtlijn_HBV_nieuwe_inzichten_2012.pdf). Accessed: 14 January 2022.
- 487 30. Hofman R, Veldhuijzen I, Schalm S, Richardus JH. **Hepatitis: Counting is**  
488 **knowing**. Rotterdam; 2017. Report, available at: [http://www.liverdoc.nl/wp-](http://www.liverdoc.nl/wp-content/uploads/Hepatitis-Meten-is-weten-29-aug-2017.pdf)  
489 [content/uploads/Hepatitis-Meten-is-weten-29-aug-2017.pdf](http://www.liverdoc.nl/wp-content/uploads/Hepatitis-Meten-is-weten-29-aug-2017.pdf). Accessed 14 January  
490 2022.
- 491 31. McKay KDB, R.J.; Conover, W.J.: **A comparison of three methods for selecting**  
492 **values of input variable in the analysis of output from a computer code**.  
493 *Technometrics* 1979, **21**:239-245.
- 494 32. Hoornenborg E, Achterbergh RC, van der Loeff MFS, Davidovich U, van der Helm JJ,  
495 Hogewoning A, van Duijnhoven YT, Sonder GJ, de Vries HJ, Prins M: **Men who have**  
496 **sex with men more often chose daily than event-driven use of pre-exposure**  
497 **prophylaxis: baseline analysis of a demonstration study in Amsterdam**. *J Int*  
498 *AIDS Soc* 2018, **21**(3):e25105.
- 499 33. Koopsen J, van Steenbergen JE, Richardus JH, Prins M, Op de Coul ELM, Croes EA,  
500 Heil J, Zuure FR, Veldhuijzen IK: **Chronic hepatitis B and C infections in the**  
501 **Netherlands: estimated prevalence in risk groups and the general**  
502 **population**. *Epidemiol Infect* 2019, **147**:e147.
- 503 34. Rutgers: **A World of Difference. The sexual health of LGBT people in the**  
504 **Netherlands, 2013**. Utrecht: Rutgers; 2014.  
505
